# Supplementary material for: Brucellosis awareness and knowledge in communities worldwide: A systematic review and meta-analysis of 79 observational studies
Source: PLoS Negl Trop Dis. 2019 May 2;13(5):e0007366. doi: 10.1371/journal.pntd.0007366 (PMC6497230; doi:10.1371/journal.pntd.0007366)
Supplement: S5 Appendix — (XLSX) [file pntd.0007366.s005.xlsx]

## Sheet: Burcellosis awareness meta
1. Data regarding brucellosis awareness (heard of brucellosis)
Study	event	n	Country	Region	Occupation( Population)	Main animals invovled
Arif, 2017	294	420	Pakistan	Asia	Dairy farmers	Cattle and buffaloes
Holt, 2011	89	107	Egypt	Africa	Livestock owners	Cattle and buffaloes
Adesokan, 2013	42	157	Nigeria	Africa	Livestocks owner and Livestock trader	Cattle
Kothalawala, 2018	18	155	Sri Lanka	Asia	Dairy farmers	Cattle
Musallam, 2015	537	537	Jordan	Asia	Livestock owners	Cattle, sheep and goat
Kansiime, 2014	370	371	Uganda	Africa	Pastoralists	Cattle
Lindahl, 2015	65	441	Tajikistan	Asia	Dairy farmers	Cattle
Mufinda, 2011	67	170	Angola	Africa	Abattior workers and livestok farmers	Cattle, goats, sheep and pigs
Zeng, 2018	192	317	China	Asia	Pastoralists	Cattle
Njuguna, 2017	66	80	Kenya	Africa	Livestock farmers	Cattle
Yuan, 2017	211	403	China	Asia	Livestock farmers	Sheep and goat
Peng, 2016	155	300	China	Asia	Occupational population	Sheep and goat
Zhang, 2016	104	191	China	Asia	Livestock farmers	Sheep and goat
Xiao, 2017	111	178	China	Asia	Occupational population	Cattle, sheep and goat
Zhu, 2016	53	81	China	Asia	Dairy farmers	Cattle
Qi ,2012	78	99	China	Asia	Residents	˗
Chang, 2016	121	300	China	Asia	Students	˗
Jin, 2010	448	563	China	Asia	Livestock farmers	Cattle, sheep and goat
Guan, 2014	105	206	China	Asia	Students	˗
Lv, 2013	161	244	China	Asia	Occupational population	Cattle, sheep and goat
Li, 2013	466	595	China	Asia	Livestock farmers	Sheep and goat
Chen, 2010	625	916	China	Asia	Occupational population	Cattle, sheep and goat
Mufinda, 2015	37	323	Angola	Africa	Abattior workers and livestok farmers	Cattle
Awwad, 2017	118	118	Palestine	Asia	Livestock owners	Sheep and goat
Grahn, 2013	55	97	Tajikistan	Asia	Livestock owners	Sheep and goat
Deka, 2016	18	292	India	Asia	Dairy Farmers	Cattle
Buhari, 2015	39	42	Nigeria	Africa	Pastoralists	Cattle
Obonyo, 2015	95	120	Kenya	Africa	Pastoralists	Sheep and goat
Crow, 2013	66	75	America	North America	Dog Breeders	Dogs
Zhang, 2016	60	62	Tanzania	Africa	Human and animal Health workers	˗
Ruano, 2017	151	500	Ecuador	South America	Occupational population	Cattle
Tian, 2016	408	2491	China	Asia	Occupational population	Cattle, sheep and goat
Zhang, 2017	368	403	China	Asia	Livestock farmers	Sheep and goat
Guo, 2011	194	300	China	Asia	Occupational population	Cattle, sheep and goat
Akkus, 2011	64	97	Turkey	Asia	Livestock farmers	Cattle, sheep and goat
Eldeihy, 2017	48	69	Egypt	Africa	Livestock owners	Cattle, Buffaloes,sheep and goat
FAO,2010	440	500	Tajikistan	Asia	Livestocks owners	Cattle, sheep and goat
Bashaka,2015	223	260	Tanzania	Africa	Pastoralists , agro-pastorists and food vendors	Cattle, sheep and goat
Kant,2017	0	100	India	Asia	Livestocks owners	Cattle
Abera, 2016	108	500	Ethiopia	Africa	Livestock farmers	Livestock
Munisamy,2017	9	100	India	Asia	Dairy Farmers	Cattle
Wakene，2017	14	126	Ethiopia	Africa	Pastoralists ， human health personnel	Sheep and goat
Desta,2015	67	320	Ethiopia	Africa	Livestock farmers and human and animal health workers	Livestock
Çakmur，2015	133	151	Turkey	Asia	Livestock farmers	Cattle, sheep and goat
Madut,2017	246	650	Susan	Africa	Abattoir workers and patients	˗
Marin,2017	47	77	Susan	Africa	Abattoir workers and Animal Health Worker	˗
Nabirye,2107	159	251	Uganda	Africa	Patients	˗
Nyokabi,2018	85	154	Kenya	Africa	Occupational population	cattle, camels, sheep and goat
Mosalagae,2010	25	119	Zimbabwe	Africa	Dairy farmers	Cattle
Singh,2017	19	100	India	Asia	Abattior workers	Livestock
Mohan,2012	144	240	India	Asia	Dairy farmers	Cattle and buffaloes
Tebug,2015	0	120	Senegal	Africa	Livestock owners	Cattle
2. Data regarding the awareness of the zoonotic nature of brucellosis
Study	event	n	Country	Region	Occupation	Main animals involved
Holt, 2011	103	107	Egypt	Africa	Livestock owner	Cattle and buffaloes
Diez, 2013	115	154	Portugal	Europe	Livestock owner	Cattle
Tebug, 2014	4	140	Malawi	Africa	Dairy farmer	Cattle
Kothalawala, 2018	4	155	Sri Lanka	Asia	Dairy farmer	Cattle
Musallam, 2015	459	537	Jordan	Asia	Livestock owner	Cattle, sheep and goat
Lindahl, 2015	65	441	Tajikistan	Asia	Dairy farmer	Cattle
Mufinda, 2011	52	170	Angola	Africa	Abattior workers and livestok farmers	Cattle, goats, sheep and pigs
Zeng, 2018	103	317	China	Asia	Pastoralist	Cattle
Li, 2015	147	257	China	Asia	Occupational population	Cattle, sheep and goat
Cheng, 2016	403	493	China	Asia	Occupational population	Cattle, sheep and goat
Peng, 2016	147	308	China	Asia	Occupational population	Sheep and goat
Yang, 2014	85	147	China	Asia	Occupational population	Sheep and goat
Zhang,2016	99	191	China	Asia	Livestock farmer	Sheep and goat
Tong, 2015	35	41	China	Asia	Occupational population	Sheep and goat
Adraiti , 2014	747	1200	China	Asia	Dairy farmer	Cattle, sheep and goat
Li , 2013	301	595	China	Asia	Dairy farmer	Sheep and goat
Chen, 2010	632	916	China	Asia	Occupational population	Cattle, sheep and goat
Mufinda, 2015	0	323	Angola	Africa	Abattior workers and livestok farmers	Cattle
Awwad, 2017	106	118	Palestine	Asia	Livestock owner	Sheep and goat
Grahn, 2013	55	97	Tajikistan	Asia	Livestock owner	Sheep and goat
Deka, 2016	6	292	India	Asia	Dairy farmer	Cattle
Buhari, 2015	7	42	Nigeria	Africa	Pastoralist	Cattle
Obonyo, 2015	67	120	Kenya	Africa	Pastoralist	Sheep and goat
Crow, 2013	44	75	America	North America	Dog Breeder	Dogs
Zhangi, 2017	252	403	China	Asia	Livestock farmer	Sheep and goat
Guo, 2011	198	300	China	Asia	Occupational population	Cattle, sheep and goat
Bashaka,2015	1	260	Tanzania	Africa	Pastoralists , agro-pastorists and food vendors	Cattle, sheep and goat
Rajkumar,2016	12	250	India	Asia	Livestock owner	Livestock
Hundal,2016	115	250	India	Asia	Livestock owner	Livestock
Tesfaye,2013	0	175	Ethiopia	Africa	Farmers , dairy farmers, butchers and residents	Livestock
Chikerema,2013	68	326	Zimbabwe	Africa	Livestock owner	Cattle
Kolhe,2016	2	300	India	Asia	Resident	˗
Parahakar,2016	3	86	India	Asia	Abattior worker	Livestock
3. Data regarding the awareness of the transmission mode of brucellosis
Study	event	n	Country	Region	Poulation	Main animals involved
Arif, 2017	13	420	Pakistan	Asia	Dairy farmers	Cattle and buffaloes
Adesokan, 2013	55	157	Nigeria	Africa	Livestocks owner and Livestocks mearketers	Cattle
Lindahl, 2015	59	441	Tajikistan	Asia	Dairy farmers	Cattle
Mufinda, 2011	47	170	Angola	Africa	Abattior workers and livestok farmers	Cattle, goats, sheep and pigs
Yuan, 2017	93	403	China	Asia	Livestock farmers	Sheep and goat
Peng, 2016	149	308	China	Asia	Occupational population (farmer,rural doctors, Livestock product operators,workers in slaughterhouses)	Sheep and goat
Xiao, 2017	19	178	China	Asia	Farmer,rural doctors, Livestock product operators,abattoir workers)	Cattle, sheep and goat
Liu, 2017	579	819	China	Asia	Human health workers	˗
Li, 2016	240	802	China	Asia	Livestock farmers	Sheep and goat
Chen, 2010	557	916	China	Asia	Occupational population (farmer,rural doctors, Livestock product operators,workers in slaughterhouses)	Cattle, sheep and goat
Mangalgi， 2017	534	1084	India	Asia	Livestock owners	Sheep and goat
Zhang, 2016	57	62	Tanzania	Africa	Human and animal Health workers	˗
Ruano, 2017	130	500	Ecuador	South America	Occupational population (farmer,rural doctors, Livestock product operators,workers in slaughterhouses)	Cattle
Tian, 2016	332	2491	China	Asia	Residents	Cattle, sheep and goat
Guo, 2011	164	300	China	Asia	Occupational population (farmer,rural doctors, Livestock product operators,workers in slaughterhouses)	Cattle, sheep and goat
Bahsaka,2015	142	260	Tanzania	Africa	Pastoralists ， pastoral, agro-pastorists and food vendors	Cattle, sheep and goat
Madut,2017	221	650	Tanzania	Africa	Abattoir workers and patients	˗
Marin,2017	19	77	Susan	Africa	Abattoir workers and Animal Health Worker
4. Data regarding the awareness of the clinical signs and symptoms of human brucellosis
Study	event	n	Country	Region	Poulation	Main animals involved
Adesokan, 2013	8	157	Nigeria	Africa	Livestock owner and livestock（product）trader	Cattle
Li Shihua, 2015	113	264	China	Asia	Occupational population	Cattle, sheep and goat
Cheng Xia, 2016	180	493	China	Asia	Occupational population	Cattle, sheep and goat
Peng Ying, 2016	130	308	China	Asia	Occupational population	Sheep and goat
Yang Xiaobing, 2014	66	147	China	Asia	Occupational population	Sheep and goat
Xiao Lin, 2017	38	178	China	Asia	Occupational population (farmer,rural doctors, Livestock product operators,workers in slaughterhouses)	Cattle, sheep and goat
Li Qiang, 2017	62	200	China	Asia	Occupational population	Sheep and goat
Tong Guoqiang, 2015	25	41	China	Asia	Occupational population	Sheep and goat
Chang Hongyun, 2016	120	300	China	Asia	Student	˗
Liu Shuanglan, 2017	621	819	China	Asia	Human health worker	˗
Li Guangzhi, 2016	281	802	China	Asia	Livestock farmer	Sheep and goat
Adraiti Toruhan , 2014	611	1200	China	Asia	Livestock farmer	Cattle, sheep and goat
Li Ye, 2013	340	519	China	Asia	Livestock farmer	Sheep and goat
Mangalgi， 2017	535	1048	India	Asia	Animal health worker	˗
Deka, 2016	9	292	India	Asia	Dairy Farmer	Cattle
Perez Ruano, 2017	117	500	Ecuador	South America	Occupational population	Cattle
Huo Minping, 2013	1140	1538	China	Asia	Pastoralist	Cattle, sheep and goat
Zong Xuemei, 2015	88	201	China	Asia	Occupational population	Cattle, sheep and goat
Hou Zhi, 2010	163	217	China	Asia	Pastoralist	Cattle, sheep and goat
Gao Wen, 2018	98	265	China	Asia	Occupational population	Cattle, sheep and goat
Akkus, 2011	23	97	Turkey	Asia	Livestock farmer	Cattle, sheep and goat
FAO,2010	300	500	Tajikistan	Asia	Livestock owner	Cattle, sheep and goat
Madut,2017	246	650	Susan	Africa	Abattoir workers and patients	˗
5. Data regarding the awareness of the signs of animal brucellosis
Study	event	n	Country	Region	Population	Main animals involved
Adesokan, 2013	59	157	Nigeria	Africa	Livestocks owner and Livestocks mearketers	Cattle
Kansiime, 2014	72	371	Uganda	Africa	Pastoralists	Cattle
Yuan , 2017	97	403	China	Asia	Livestock farmers	Sheep and goat
Li, 2015	63	257	China	Asia	Occupational population (farmer,rural doctors, Livestock product operators,workers in slaughterhouses)	Cattle, sheep and goat
Cheng, 2016	221	493	China	Asia	Occupational population (farmer,rural doctors, Livestock product operators,workers in slaughterhouses)	Cattle, sheep and goat
Li, 2017	65	200	China	Asia	Occupational population (farmer,rural doctors, Livestock product operators,workers in slaughterhouses)	Sheep and goat
Tong, 2015	26	41	China	Asia	Occupational population (farmer,rural doctors, Livestock product operators,workers in slaughterhouses)	Sheep and goat
Guan, 2014	31	206	China	Asia	Student	˗
Li , 2016	155	802	China	Asia	Livestock farmers	Sheep and goat
Toruhan , 2014	593	1200	China	Asia	Livestock farmers	Cattle, sheep and goat
Li , 2013	41	519	China	Asia	Livestock farmers	Sheep and goat
Pere, 2017	149	500	Ecuador	South America	Occupational population (farmer,rural doctors, Livestock product operators,workers in slaughterhouses)	Cattle
Zong, 2015	45	201	China	Asia	Occupational population （farmer，livestock trader，workers in slaughterhouses and others )	Cattle, sheep and goat
Gao, 2018	54	265	China	Asia	Occupational population (farmer,rural doctors, Livestock product operators,workers in slaughterhouses)	Cattle, sheep and goat
FAO, 2010	140	500	Tajikistan	Asia	Livestock owners	Cattle, sheep and goat
Madut, 2017	231	650	Susan	Africa	Abattoir workers and patients	˗
6. Data regarding the awareness of vaccination as control tool
Study	event	n	Country	Region	Population	Animal
Lindahl, 2015	390	441	Tajikistan	Asia	Dairy farmers	Cattle
Mufinda, 2011	39	170	Angola	Africa	Abattior workers and livestok farmers	Cattle, sheep and goat
Zeng, 2018	176	317	China	Asia	Pastoralists	Cattle
Li Shihua, 2015	124	257	China	Asia	Occupational population (farmer,rural doctors, Livestock product operators,workers in slaughterhouses)	Cattle, sheep and goat
Cheng Xia, 2016	209	493	China	Asia	Occupational population (farmer,rural doctors, Livestock product operators,workers in slaughterhouses)	Cattle, sheep and goat
Chang Hongyun, 2016	78	300	China	Asia	Students	˗
Jin Fuzhi, 2010	186	563	China	Asia	Livestock farmers(owners)	Cattle, sheep and goat
Adraiti Toruhan , 2014	837	1200	China	Asia	Livestock farmers(owners)	Cattle, sheep and goat
Mufinda, 2015	6	323	Angola	Africa	Abattior workers and livestok farmers	Cattle
Obonyo, 2015	6	120	Kenya	Africa	Pastoralists	Sheep and goat
Zhang, 2016	4	62	Tanzania	Africa	Human and animal Health workers	˗
Eldeihy, 2017	0	69	Egypt	Africa	Livestock farmers(owners)	Cattle, sheep and goat
Rajkumar, 2016	2	250	India	Asia	Livestock farmers(owners)	Livestock
Hundal, 2016	169	250	India	Asia	Livestock farmers(owners)	Livestock
Marin, 2017	2	77	Susan	Africa	Abattoir workers and Animal Health Worker	Cattle, sheep and goat
